# Supplementary material for: Estimation of Doppler Velocity from Incoherent Scatter Spectra Using Context-Aware Transformers
Source: Copernicus journal article supplement (doi:10.5194/egusphere-2025-5022), 2025-10-30
Supplement: Supplementary file [file egusphere-2025-5022-AC1-supplement.pdf]

## Response to Reviewer 1's comments

Reviewer's comments are in black. Responses are in blue.

The manuscript reports results of line-of-sight plasma velocity fits to Arecibo ISR data using artificial intelligence (AI), namely context-aware transformers. The manuscript seems to be continuation to a series of papers by the same authors [1,2,3], in which they apply different data analysis techniques to archived coded long pulse (CLP) data from the Arecibo radar. The results suggest that AI may produce high-quality results in ISR data analysis.

While the idea to replace the traditional least-square fitting techniques with computationally less expensive (after the expensive training has been done) AI techniques is novel and the results look promising in general, I have several critical comments about the text and interpretation of the results.

1. The manuscript lacks critical references and fails to explain key principles of the AI model. If the idea is to introduce the AI techniques to the ISR community, skipping most of the key information "for brevity" may not be the best choice. It is understandable that Section 3.1, which describes the AI architecture, is full of field-specific jargon, but the terminology should be explained to the reader in such a level that reading the text is possible also for a non-expert of the field without reading all the references, and references to the key concepts should be given for readers who are interested in more details.

Response: Section 3.1 has been significantly expanded to clarify field-specific terminology and to explain the terms of the transformer architecture in a manner accessible to non-machine-learning experts. We have also included a number of references in several areas.

2. The actual scientific target of the measurements considered remains unclear. The authors first give a few very general motivations for measuring the Doppler velocities (without references). The AI model, which solves only for plasma velocities, is then compared with a least-squares fitting technique, which fits also several other parameters. Is there some specific application, for which the velocities alone are important? Would it be possible to use the AI model to fit the same parameters that are fitted with the least-squares solver? On line 300 the authors finally claim that focus of

this study is around 110 km altitude. What exactly is the focus and why not to mention it in the abstract and in the introduction?

Response: The target of the manuscript is to estimate Doppler velocity from incoherent scatter spectra using context-aware transformers. Other than ISRs, Doppler velocity determination is a common functionality for most radars, such as weather and air-traffic control radars. The region around 110 km altitude has a larger vertical gradient in velocity and electron density. The rapid changes make it easier to contrast the differences between different techniques. We have added more references on Doppler measurements and a sentence in the abstract to indicate the focus around 110 km.

3. Least-square fits contain several tunable parameters that may greatly affect quality of the results, but these are not considered at all. In particular, stopping criteria for the iterations and initial values of the fitted parameters may affect both standard deviation and bias of the results. These should be carefully evaluated when comparisons between the AI model and the least-squares fits are performed.

Response: In the present study, the least-squares baseline does not involve a general iterative optimization with multiple tunable convergence parameters. Doppler velocity is estimated by minimizing the squared error between the measured and modeled spectra over a one-dimensional grid of Doppler shifts with a fixed resolution (0.1 m/s). For this formulation, the objective function admits a unique global minimum for a given resolution, and the resulting solution is therefore deterministic and independent of both initialization and stopping criteria. The following text has been added to the end of section 3.3.

‘Finally, the traditional curve fitting method is included as a reference for comparison against the best-performing deep learning model, where Doppler velocity is obtained by a one-dimensional least-squares search over a discretized Doppler shift grid with a resolution of 0.1 m/s. For this formulation, the cost function has a unique global minimum at the chosen resolution, yielding a deterministic solution that is independent of initialization and stopping criteria. The fitting algorithm is described in Li & Zhou (2024).’

4. Computational requirements are not discussed at all until the Conclusions section, where the authors claim that "Velocity inference is roughly 100 times faster than the fitting method and requires significantly fewer computational resources.". This may be true, but some key figures about computational resources needed for both training the model and the final velocity inference should be given. Also the training part is

important for potential users of the technique, because it seems that one may need to train the model for each radar and radar operation mode separately.

Response: We have revised the manuscript to explicitly discuss the computational requirements of both training and inference.

The relevant text in the conclusion section is expanded to ‘Beyond accuracy, the proposed transformer model also offers a clear computational advantage over the least-squares fitting method. Once trained, Doppler velocity inference is approximately 100 times faster than curve fitting and requires substantially fewer computational resources. The model contains approximately 100 million parameters ( $\approx 300$  MB) and runs efficiently for inference on any modern discrete GPU, making it suitable for large-scale data processing and near-real-time applications. Model training is performed using synthetic data and can be completed in approximately two days on a higher-end GPU (e.g., RTX 3090 or above).’

5. The Arecibo radar collapsed a few years ago, but there are several other incoherent scatter radars in the world. Re-analysis of the archived Arecibo data is indeed valuable, but the authors could also comment if their technique might be usable for data from other radars that have considerably lower SNR and operate in completely different geophysical environments. In particular, other radars may observe much larger velocities and the users are typically interested also in electron densities and electron and ion temperatures, not just plasma velocities. At very end of the conclusions the authors claim, without any justification, that the model can be applied more broadly, but the very different noise levels and very much larger line-of-sight velocities observed with many other ISRs are not discussed at all.

Response: Although the examples in this study are designed specifically for Arecibo ISR, the model itself is trained entirely on synthetic ISR spectra, for which radar parameters, Doppler velocity range, and SNR are manually controlled. Therefore, the training set can be easily adapted to a different SNR and Doppler velocity range.

The relevant text has been revised to ‘As the training data are generated using physics-based ISR simulations, SNR and Doppler velocity range can be explicitly controlled during data generation. Therefore, the proposed framework is not inherently limited to the Arecibo ISR and can be adapted to other instruments by retraining the model using instrument-specific parameters and configurations.’

Detailed comments:

Lines 22-23: "particularly during disturbed conditions."

Does this mean that the radars are more reliable than other instruments during disturbed conditions?

Response: Doppler measurement from radars is the most prevalent and recognized technique to measure the plasma drift velocity. The instrument's accuracy depends mostly on the level of ionization. We have removed the "disturbed conditions" in the revision.

Line 25-26: References to studies where these measurements are valuable would be useful.

Response: More references are added.

Line 28: To my understanding, the moment and autocorrelation methods are not commonly used for ISR data analysis, because computers are powerful enough for the least-squares fits and the users are typically interested in many other plasma parameters as well. Please correct me if I am wrong.

Response: The Arecibo velocity data in the CEDAR-Madrigal database are based on moment or autocorrelation methods. We do not know exactly how other ISR sites derive the line-of-sight velocities, but suspect that this may still be the prevailing method. Obtaining the velocity separately is typically not about computational load. It is more about reducing the number of free parameters in the least-squares fitting to improve the accuracy and convergence of other parameters. We have added " More importantly, fitting the Doppler shift along with other ionosphere parameters makes the LSF less accurate and more difficult to converge on the optimal solution" at the end of the paragraph.

Lines 33-34: "Their easy implementations and computational efficiency make them a popular first choice."

Again, is this still true for IS radars nowadays?

Response: Please see the response above.

Lines 39-40: "Unlike traditional methods,..."

Does this refer to some traditional machine learning methods, or to the traditional radar data analysis methods?

Response: By “Traditional”, we meant non-machine learning methods. We have changed the phrase to “Unlike fitting methods”.

Line 59: Please give a reference to the coded long pulse technique.

Response: We have moved the references for CLP from a later part to where CLP is first mentioned.

Line 64: "...with the traditional curve fitting method."

Please explain what is "the traditional curve fitting method", and give a reference.

Response: “The traditional curving fitting method” is the least-squares fitting method. We have changed the sentence to: “The interpolation was originally introduced for compatibility with the LSF method used in Li and Zhou (2024) and is retained in this work without modification.”

Equation (1): Shape of this profile seems to affect the final results, because the context-aware AI model learns this profile shape. Is there some physical justification for the selected function?

Response: Equation (1) constrains the maximum vertical variation of plasma parameters over the 1.5 km altitude range, with hyperparameters selected empirically based on variability observed in real ISR measurements.

Lines 85-86: "context-aware" and "context-unaware" are here used without explaining the terms first.

Response: We added ‘a context-aware model that incorporates information from adjacent altitude bins, and a context-unaware model that processes each altitude profile independently’. after the relevant texts.

Lines 93-94: Please give references to the "broader definitions".

Response: The wording referring to “broader definitions” has been removed in the revised manuscript.

Section 2: It would be useful to show some examples of the synthetic IS spectra with different noise levels.

Response: The following sentence has been added to the first paragraph of Section 2 to direct the reader to references where incoherent scatter and synthetic spectra are discussed extensively. One additional reference has also been included.

‘Representative examples of synthetic incoherent scatter spectra at different noise levels can be found in Aponte et al. (2006) and Li & Zhou (2024).’

Sections 3.1, 3.2 and 3.3: Please explain the AI terminology so that also readers who are not familiar with it can follow the description at least superficially, and give sufficient references. I will not list every single point separately in these comments.

Response: Done

Lines 124-125: "In transformer architectures such as BERT or ViT (Devlin et al. 2019; Dosovitskiy et al. 2020)."

This sentence seems to be completely detached from the surrounding text.

Response: This was a typo in the original manuscript. It was supposed to be a comma rather than a period after the sentence.

Line 199: "...context-unaware model is trained on standalone 101-point spectra with artificial noise..."

Is this noise somehow different from the noise added to the 5x101 input of the context-aware model?

Response: No. The same noise variance is applied independently at each height in both models. The context-aware model uses all five height-resolved spectra as separate tokens, while the context-unaware model averages the five heights.

Lines 208-217 & Figure 2. I do not understand what LSF-ideal and LSF-realistic mean here and how the comparison is done. The contours in Figure 2 are as function of bandwidth and noise std, but then the authors claim that there was no added noise (noise std=0?) in the LSF-ideal case. Please explain what happens in the comparison.

Response: LSF-ideal and LSF-realistic differ only in how the spectrum used for Doppler fitting is obtained. In the LSF-ideal case, we assume the true (noise-free) spectrum shape is known and retrieve the Doppler velocity by shifting this fixed template along the frequency axis and minimizing the least-squares error. LSF-Ideal represents the limiting case for the LSF method. In the LSF-realistic case, the spectrum shape is unknown and must first be estimated from noisy data. To make it easier to read, we have also added the explanation in the Figure 2 caption.

Lines 234-235: "...frequently used moment method..."

Please provide references that demonstrate the frequent use of the moment method in ISR data analysis.

Response: References are added in the introduction. "frequently used" is removed. Please see the response to the "Line 28" comment.

Lines 243-244: Is the bias in the LSF results possibly affected by the initial parameter values? One might expect this kind of bias profile if the iteration starts from zero velocity and tends to stop a bit too early.

Response: No. The least-squares Doppler estimation has a unique optimal solution and is invariant to the initial parameter value; the bias is therefore not related to early stopping.

Lines 244-246: "The LSF and moment methods underestimate the true velocity for the same reason that the mean velocity tends to zero in the absence of noise."

I do not understand this sentence. What is "the same reason"?

Response: The original sentence has a typo. "in the absence of noise" should have been "in the absence of signal". The sentence is now changed to: "In the extreme case of all noise and no signal, the mean LSF and moment velocities tend to zero because the estimated velocities are symmetrically distributed at positive and negative values. Similarly, as long as there is noise, LSF and moment techniques tend to underestimate the velocity amplitude."

Lines 248-249: Does the LSF standard deviation depend also on stopping criteria of the iteration? If the criteria are too loose, the iteration might stop at random locations around the true minimum of the cost function, increasing the noise.

Response: No. The least-squares fitting used here does not rely on an iterative optimization with stopping criteria. For each profile, the cost function has a unique global minimum that is deterministically identified, so the standard deviation of the LSF results is not affected by stopping criteria.

Figure 3, panel c: please change the colors, especially yellow is almost invisible.

Response: Done

Lines 279-280: "For a slowly varying quantity, the standard deviation of the second-order difference of independent samples is  $\sqrt{6}$  times of the random error, as measured by the standard deviation."

Please give a reference.

Response: We have expanded the explanation. The revised version reads: We use the standard deviation of the second-order difference to estimate the velocity error. The second order difference,  $y$ , of a signal  $x$  at time  $t_i$  is  $y(t_i) = x(t_i + \Delta t_i) - 2x(t_i) + x(t_i - \Delta t_i)$ , where  $\Delta t_i$  is the sampling interval. For a slowly varying signal with superposed noise, the variance of  $y$  is 6 times the variance of  $x$ . The standard deviation

of the second-order difference of independent samples is thus  $\sqrt{6}$  times of the random error, as measured by the standard deviation.

Lines 294-296: Is it possible that the fluctuations are true temporal variations in the wind field?

Response: The fluctuations can be from the velocity field (even though the second-order derivative can remove the linear variation). We have added this possibility in the revision. The added text reads: "Another possibility is that the standard deviation also contains non-linear temporal variations in the velocity field."

Lines 299-300: "In any event, the AI error is still 30% smaller than the LSF method around 110 km, which is the focus of the current study"

What exactly is the focus of the current study, and why is this mentioned only on line 300?

Response: We have added the rational of focusing on ~110 km at the beginning of Section 4. The added text reads: "We will mainly focus on the comparison in the E-region around 110 km where the vertical velocity and electron density gradients are larger than in the F-region. The larger gradients limit the height range one can integrate, and the effect of different signal processing techniques can be more readily seen."

Caption of Figure 5: (divided by 20) -> (divided by 40)?

Response: Thanks for the catch. It should have been divided by 40.

Conclusions: The conclusions should summarize the results and they should preferably be understandable without reading the whole manuscript. Neither of these conditions is fulfilled in this case. The contents of the first paragraph would better fit to the preceding sections, and the discussion about computing resources should be expanded there.

Response: We have rewritten the conclusion.

References used in the response.

Aponte, N., M. P. Sulzer, M. J. Nicolls, R. Nikoukar, and S. A. Gonzalez, Molecular ion composition measurements in the F1 region at Arecibo." *Journal of Geophysical Research: Space Physics* 112.A6, 2007.

Li, Y., and Zhou, Q.: Measurements of F1-region ionosphere state variables at Arecibo through quasi height-independent exhaustive fittings of the incoherent scatter ion-line spectra, *J. Geophys. Res. Space Phys.*, 129(11), e2024JA032620, 2024.



Li, Y., and Zhou, Q.: Accurate spectral fitting in the upper F-region using the randomly coded data of the Arecibo 430 MHz radar, *J. Geophys. Res. Space Phys.*, 130, e2025JA033877, <https://doi.org/10.1029/2025JA033877>, 2025a.

Zhou, Q., Li, Y., and Gong, Y.: Variance estimations in the presence of intermittent interferences and their applications to incoherent scatter radar signal processing, *Atmos. Meas. Tech.*, 17(14), 4197–4209, <https://doi.org/10.5194/amt-17-4197-2024>, 2024.
